# Supplementary material for: Two-dimensional layered Janus-In2SeTe/C2N van der Waals heterostructures for photocatalysis and photovoltaics: first-principles calculations
Source: Royal Society of Chemistry journal article supplement (doi:10.1039/d0nj03296d), 2020-01-01
Supplement: d0nj03296d1.pdf [file d0nj03296d1.pdf]

## Supplementary material

### Two-dimensional layered Janus-In<sub>2</sub>SeTe/C<sub>2</sub>N van der Waals heterostructures for photocatalysis and photovoltaics: First-principles calculations

Xiao-Hua Li,<sup>a</sup> Bao-Ji Wang,<sup>\*a</sup> Hui Li,<sup>a</sup> Xue-Feng Yang,<sup>a</sup> Rui-Qi Zhao,<sup>b</sup> Xing-Tao Jia,<sup>a</sup> and San-Huang Ke<sup>\*c</sup>

<sup>a</sup>School of Physics and Electronic Information Engineering, Henan Polytechnic University, Jiaozuo 454000, China

<sup>b</sup>School of Materials Science and Engineering, Henan Polytechnic University, Jiaozuo 454000, China

<sup>c</sup>MOE Key Laboratory of Microstructured Materials, School of Physics Science and Engineering, Tongji University, Shanghai 200092, China

\*Corresponding author: [wbj@hpu.edu.cn](mailto:wbj@hpu.edu.cn)

\*Corresponding author: [shke@tongji.edu.cn](mailto:shke@tongji.edu.cn)

1. The band structure and electrostatic potentials with/without dipole corrections
2. Two types of the heterostructures fabricated by C<sub>2</sub>N and Janus In<sub>2</sub>SeTe monolayers
3. The molecular dynamics simulations of Janus-In<sub>2</sub>SeTe/C<sub>2</sub>N vdWHs
4. The exciton binding energies of Janus-In<sub>2</sub>SeTe/C<sub>2</sub>N vdWHs and their components
5. The band structures and alignments of InSe/C<sub>2</sub>N and InTe/C<sub>2</sub>N vdWHs
6. Computational detail of the carrier mobility
7. Orthorhombic lattices of Janus-In<sub>2</sub>SeTe/C<sub>2</sub>N vdWHs and their parent monolayers
8. The elastic modulus and the deformation potential calculations of C<sub>2</sub>N and Janus-In<sub>2</sub>SeTe monolayers
9. The elastic modulus and the deformation potential calculations of Janus-In<sub>2</sub>SeTe/C<sub>2</sub>N vdWHs
10. Discussion S1

## 1. The band structure and electrostatic potentials with/without dipole corrections

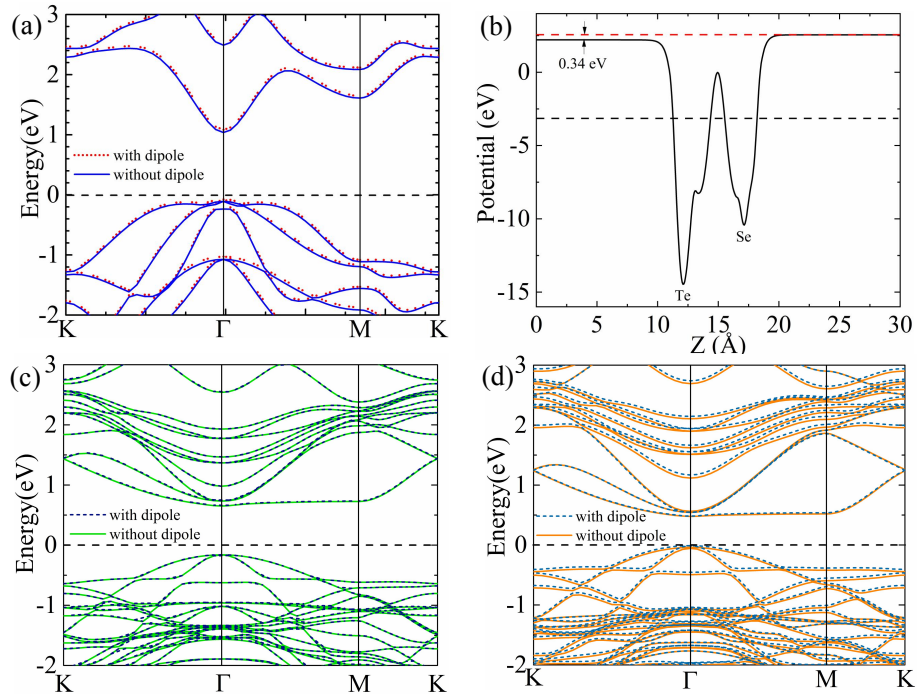

Fig. S1. (a) The band structure and electrostatic potentials of Janus  $\text{In}_2\text{SeTe}$  monolayer with/without dipole corrections applied. (b) The electrostatic potentials of Janus  $\text{In}_2\text{SeTe}$  monolayer with dipole corrections applied. Band structures (c)  $\text{TeIn}_2\text{Se}/\text{C}_2\text{N}$ , (d)  $\text{SeIn}_2\text{Te}/\text{C}_2\text{N}$  heterostructure obtained with/without dipole corrections. All results are calculated with PBE functional.

## 2. Two types of the heterostructures fabricated by Janus- $\text{In}_2\text{SeTe}$ and $\text{C}_2\text{N}$ monolayers

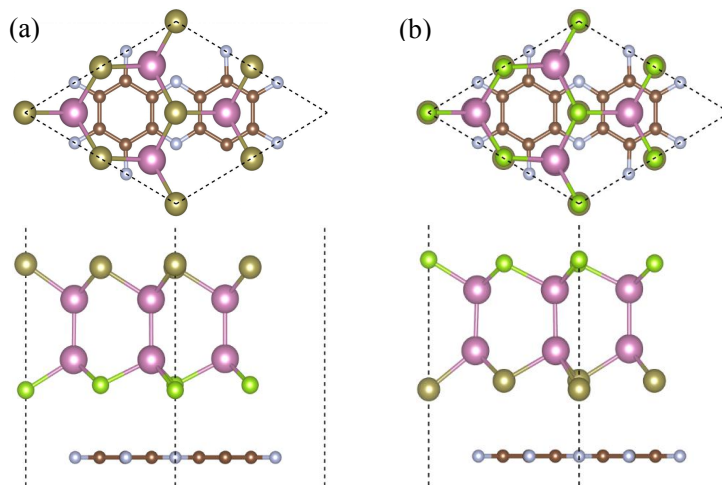

Fig. S2. Top and side views of (a)  $\text{TeIn}_2\text{Se}/\text{C}_2\text{N}$  and (b)  $\text{SeIn}_2\text{Te}/\text{C}_2\text{N}$  vdWHs with  $\gamma$ -stacking configuration.

### 3. The molecular dynamics simulations of Janus-In<sub>2</sub>SeTe/C<sub>2</sub>N vdWHs

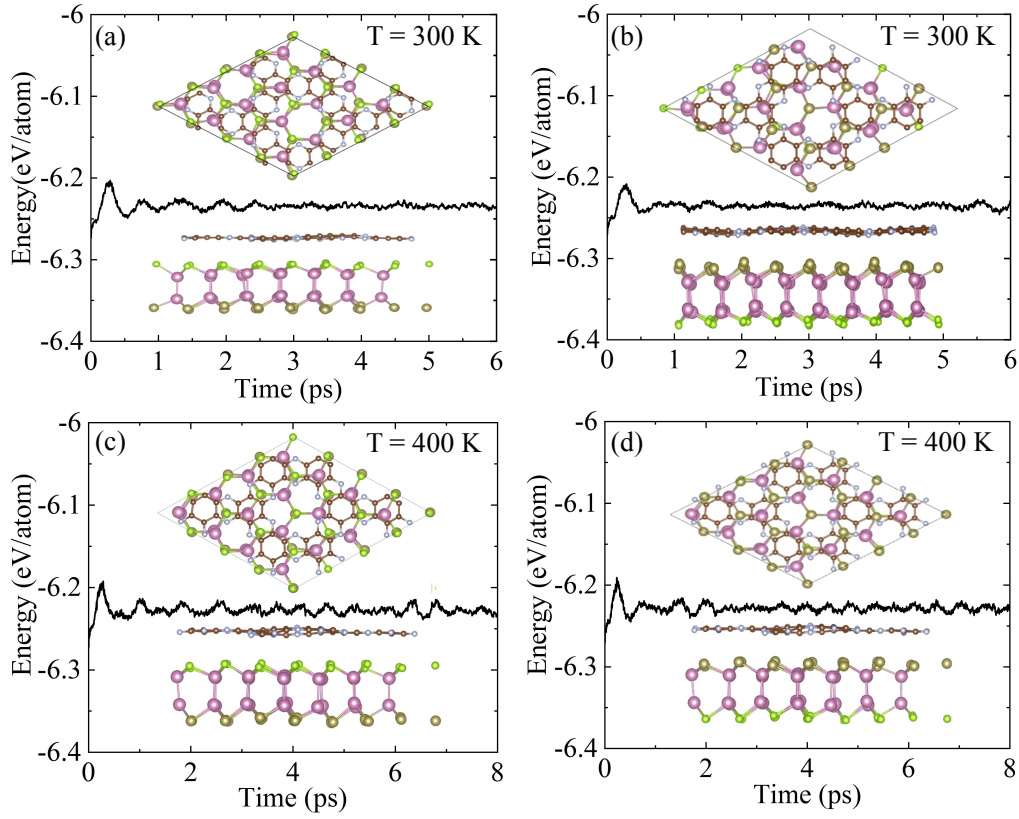

**Fig. S3.** The results of molecular dynamics simulation of (a,c) TeIn<sub>2</sub>Se/C<sub>2</sub>N and (b,d) SeIn<sub>2</sub>Te/C<sub>2</sub>N heterostructures.

### 4. The exciton binding energies of Janus-In<sub>2</sub>SeTe/C<sub>2</sub>N vdWHs and their components

Table S1: Macroscopic static dielectric constants and exciton binding energies of Janus-In<sub>2</sub>SeTe, C<sub>2</sub>N monolayers and Janus-In<sub>2</sub>SeTe/C<sub>2</sub>N heterostructures

|                                       | $\epsilon_{ion}$ |      |      | $\epsilon_{el}$ |      |      | $E_{eb}$ |
|---------------------------------------|------------------|------|------|-----------------|------|------|----------|
|                                       | $x$              | $y$  | $z$  | $x$             | $y$  | $z$  |          |
| C <sub>2</sub> N                      | 2.73             | 2.73 | 1.13 | 0.04            | 0.04 | 0.01 | 1.14     |
| In <sub>2</sub> SeTe                  | 3.24             | 3.24 | 1.34 | 0.96            | 0.96 | 0.01 | 0.10     |
| TeIn <sub>2</sub> Se/C <sub>2</sub> N | 4.03             | 4.03 | 1.45 | 1.02            | 1.02 | 0.02 | 0.12     |
| SeIn <sub>2</sub> Te/C <sub>2</sub> N | 4.06             | 4.05 | 1.45 | 1.08            | 1.08 | 0.02 | 0.14     |

## 5. The band structures and alignments of InSe/C<sub>2</sub>N and InTe/C<sub>2</sub>N vdWHs

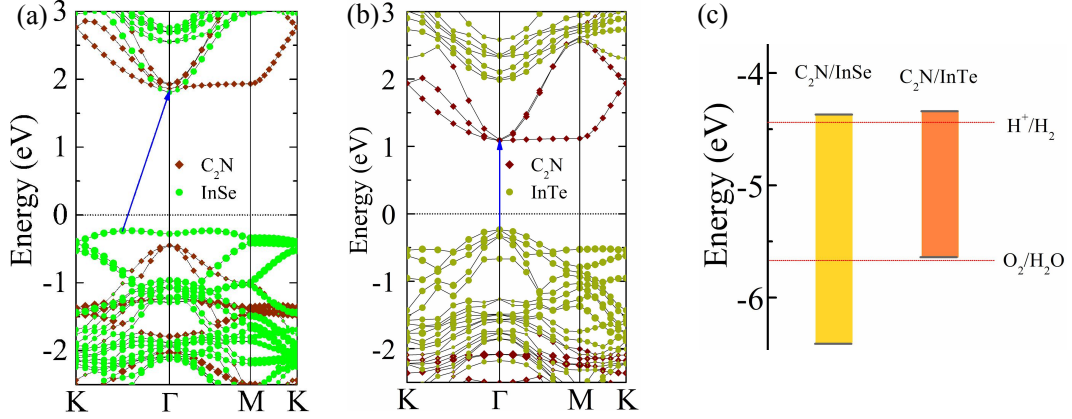

**Fig. S4.** The band structures of (a) InSe/C<sub>2</sub>N and (b) InTe/C<sub>2</sub>N heterostructures and (c) their band alignments. The redox potentials of water splitting at pH 0 (red dotted line) is shown for comparison.

## 6. Computational detail of the carrier mobility

Using the acoustic phonon limited method, we quantitatively estimate the carrier mobility for Janus-In<sub>2</sub>SeTe/C<sub>2</sub>N vdWHs and their parent monolayers. In 2D materials, the carrier mobility can be calculated by the formula [1-2]

$$\mu_{2D} = \frac{2e\hbar^3 C_{2D}}{3k_B T |m^*|^2 (E_i^i)^2}$$

where  $e$ ,  $\hbar$ ,  $k_B$  and  $T$  is the electron charge, reduced Planck constant, Boltzmann constant and temperature, respectively. The temperature is set to be 300 K in the calculations.  $C_{2D}$  is the in-plane stiffness of 2D material calculated by  $C_{2D} = (\partial^2(E - E_0) / \partial \varepsilon^2) / S$ , where  $E - E_0$  is the total energy shift activated by strain effect and  $S$  is the equilibrium area,  $m^*$  is the effective mass in the transport direction for the electron or hole, which can be obtained by  $m^* = \hbar^2 (\partial^2 E / \partial k^2)^{-1}$ .  $E_i^i$  is the deformation potential constant of the valence band maximum (VBM) for holes and conduction band minimum (CBM) for electrons along the transport direction, defined by  $E_i^i = \Delta V_i / (\Delta l / l_0)$ , in which  $\Delta V_i$  is the energy change of the  $i$  band under proper cell compression and dilatation,  $l_0$  is the lattice constant in the transport direction, and  $\Delta l$  is the deformation of  $l_0$ .

For convenience, orthorhombic lattices instead of pristine hexagonal lattices are used to calculate the uniaxial strain responses along x and y directions, as shown in Fig. S5. The  $m^*$  of electrons and holes are calculated by fitting parabolic functions to CBM and VBM along the transport direction. Then, the  $C_{2D}$  and  $E_i^i$  are obtained by parabolic fitting of the total energy shift and linearly fitting of the band edge positions of the VBM and CBM as a function of the uniaxial strain along x and y directions, respectively (see Fig. S6 and S7).

[1] Z. Guo, J. Zhou, L. Zhu, Z. Sun, Mxene: A promising photocatalyst for water splitting, *J. Mater. Chem. A* 4 (2016) 11446–11452.

[2] J. Dai, X. C. Zeng, Titanium trisulfide monolayer: Theoretical prediction of a new direct-gap semiconductor with high and anisotropic carrier mobility, *Angew. Chem. Int.* 54 (2015) 7572–7576.

## 7. Orthorhombic lattices of Janus-In<sub>2</sub>SeTe/C<sub>2</sub>N vdWHs and their parent monolayers

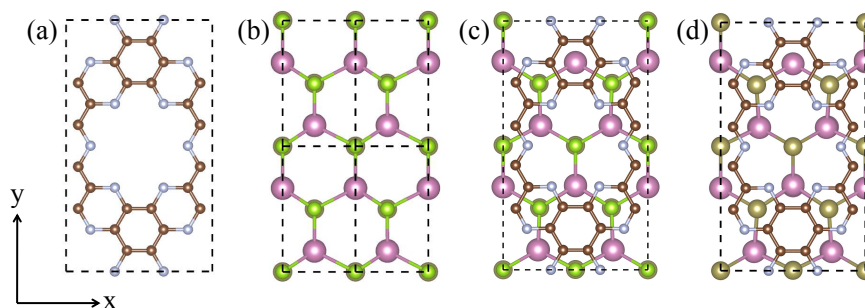

**Fig. S5.** The orthorhombic lattices used to calculate the uniaxial strain responses along *x* and *y* directions for (a) C<sub>2</sub>N, (b) Janus-In<sub>2</sub>SeTe monolayers, (c) TeIn<sub>2</sub>Se/C<sub>2</sub>N, (d) SeIn<sub>2</sub>Te/C<sub>2</sub>N vdWHs.

## 8. The elastic modulus and the deformation potential calculations of $C_2N$ and Janus- $In_2SeTe$ monolayers

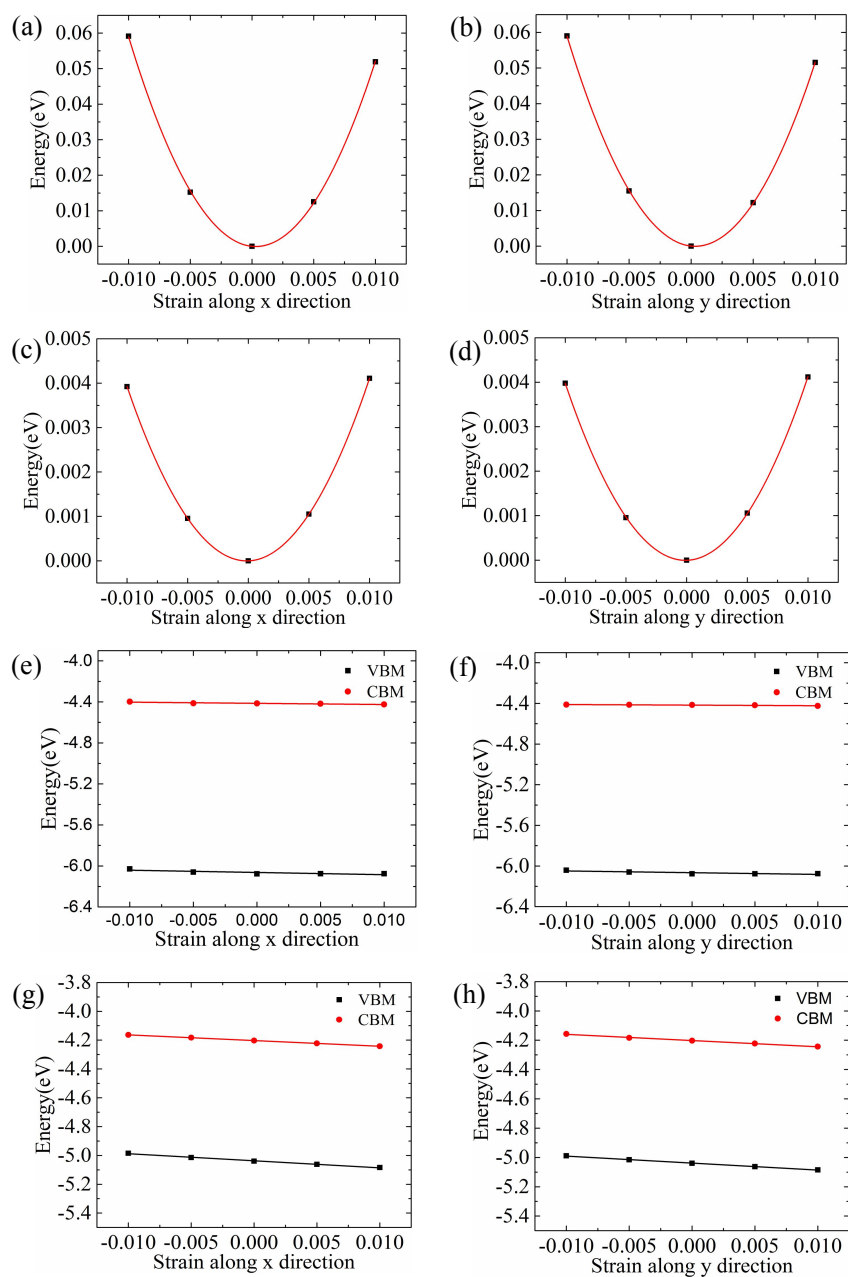

**Fig. S6.** The relationship between energy and strain for (a,b)  $C_2N$  and (c,d)  $In_2SeTe$  monolayers. The CBM and VBM along the x and y directions as a function of deformation proportion for (e,f)  $C_2N$  and (g,h)  $In_2SeTe$  monolayers.

## 9. The elastic modulus and the deformation potential calculations of Janus-In<sub>2</sub>SeTe/C<sub>2</sub>N vdWHs

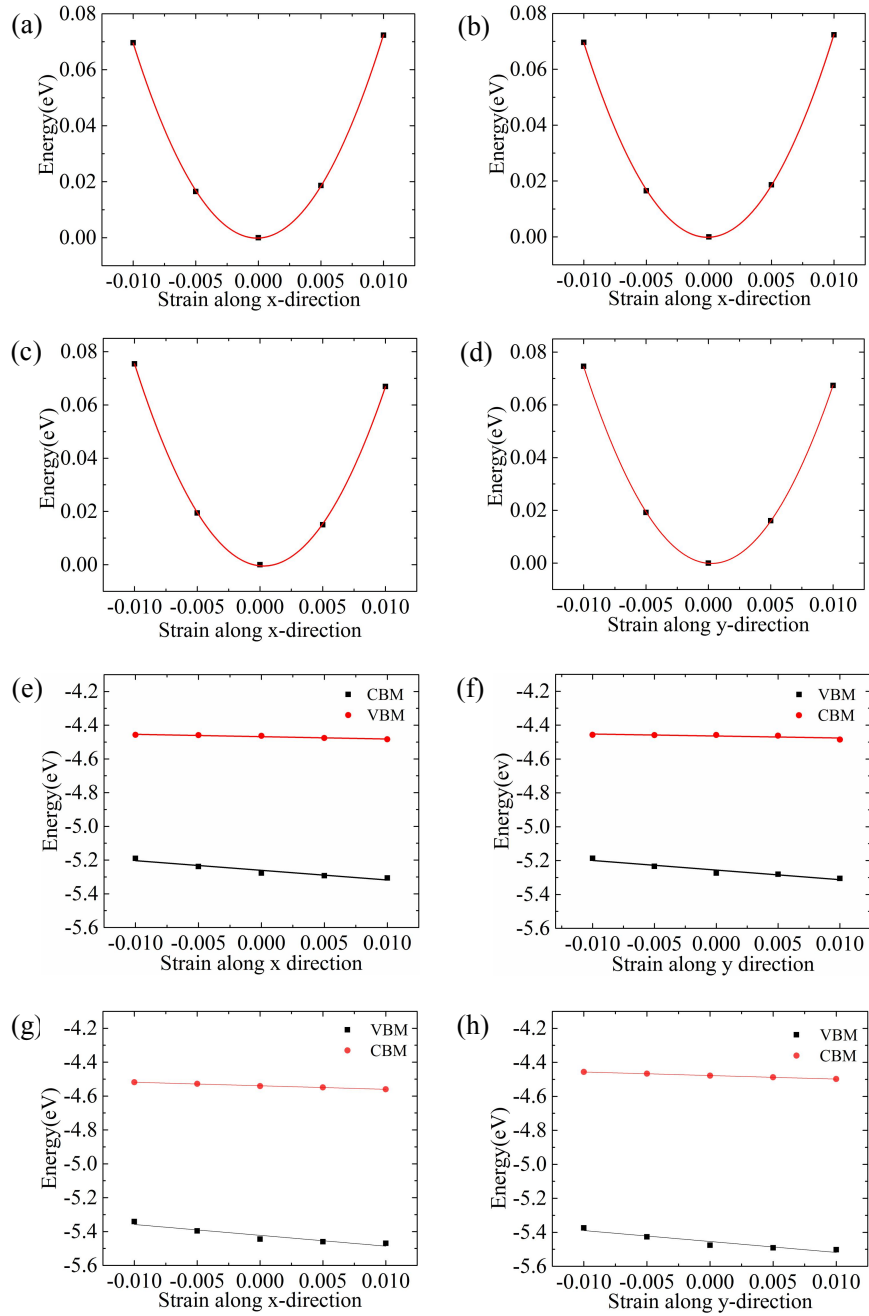

**Fig. S7.** The relationship between energy and strain for (a,b) TeIn<sub>2</sub>Se/C<sub>2</sub>N and (c,d) SeIn<sub>2</sub>Te/C<sub>2</sub>N vdWHs. The CBM and VBM along the x and y directions as a function of deformation proportion for (e,f) TeIn<sub>2</sub>Se/C<sub>2</sub>N and (g,h) SeIn<sub>2</sub>Te/C<sub>2</sub>N vdWHs.

## 10. Discussion S1:

As we know, in contrast to the quasiparticle selfconsistent GW method, the hybrid functional calculations (HSE) could underestimate the band gap of semiconductors. Meanwhile, we noted that the electronic structures of 2D Te-based semiconductors and Janus structures can be affected by the spin-orbital coupling (SOC) effect [Phys. Chem. Chem. Phys. 2018, 20, 18571-18578]. To check the quality of the HSE06 functional adopted in this work, we performed test calculations for Janus-In<sub>2</sub>SeTe monolayer using HSE06 and G<sub>0</sub>W<sub>0</sub> functionals with/without SOC correction. The bandgap obtained with G<sub>0</sub>W<sub>0</sub> is 2.28 eV, while G<sub>0</sub>W<sub>0</sub>+SOC gives a result of 1.97 eV, which is slightly higher than the HSE06 value (1.82 eV) obtained in our work. Indeed, higher level functionals may result in more accurate result. Unfortunately, the G<sub>0</sub>W<sub>0</sub>+SOC method is computationally very expensive and thus out of reach when large data sets of periodic systems are studied, as done in this work, especially for the heterostructure systems. Thus, the HSE06 method is probably a good option in our work. Of course, for future related experimental studies, the band gaps obtained in this work should be taken with care since it is likely is slightly underestimated.
